# Supplementary material
Source: MDPI journal article supplement (https://www.mdpi.com/2073-4395/13/1/107)
Supplement: s1 [file s1]

Supplementary Table S1. Agronomic traits of 31 restorer lines achieved in this study

| Family | Plant height<br>(cm) | Tiller number | Seed Setting<br>rate | Yield per<br>plant (g) |
|--------|----------------------|---------------|----------------------|------------------------|
| TF-1   | 123.82               | 7.2           | 70.80%               | 23.11                  |
| TF-2   | 130.22               | 4.6           | 79.80%               | 21.43                  |
| TF-3   | 130.11               | 5.1           | 69.80%               | 20.11                  |
| TF-4   | 139.44               | 4.2           | 75.40%               | 22.62                  |
| TF-5   | 126.12               | 6.2           | 67.20%               | 23.54                  |
| TF-6   | 137.00               | 5.0           | 67.20%               | 27.08                  |
| TF-7   | 120.84               | 7.0           | 68.50%               | 28.09                  |
| TF-8   | 118.81               | 5.6           | 65.4%                | 20.61                  |
| TF-9   | 117.92               | 6.2           | 64.10%               | 20.13                  |
| TF-10  | 118.17               | 5.0           | 62.10                | 21.16                  |
| TF-11  | 132.90               | 5.4           | 79.70%               | 24.81                  |
| TF-12  | 121.12               | 5.8           | 63.88%               | 20.91                  |
| TF-13  | 133.04               | 4.6           | 80.80%               | 23.57                  |
| TF-14  | 124.46               | 7.6           | 61.20%               | 22.62                  |
| TF-15  | 123.40               | 7.2           | 78.40%               | 21.33                  |
| TF-16  | 114.68               | 8.0           | 65.30%               | 22.16                  |
| TF-17  | 119.00               | 7.8           | 68.20%               | 24.08                  |
| TF-18  | 130.68               | 5.0           | 79.40%               | 28.59                  |
| TF-24  | 135.80               | 4.8           | 84.10%               | 27.41                  |
| TF-25  | 132.32               | 7.6           | 74.60%               | 23.16                  |
| TF-26  | 132.84               | 5.2           | 78.10%               | 22.11                  |
| TF-27  | 130.30               | 6.2           | 80.40%               | 27.22                  |
| TF-28  | 141.22               | 6.0           | 84.20%               | 24.59                  |
| TF-29  | 137.00               | 5.0           | 67.20%               | 27.08                  |
| TF-30  | 132.26               | 4.6           | 83.10%               | 25.66                  |
| TF-31  | 136.68               | 4.4           | 86.10%               | 29.81                  |
| TF-32  | 137.22               | 6.4           | 85.10%               | 24.43                  |
| TF-33  | 135.02               | 5.2           | 84.80%               | 25.66                  |
| TF-34  | 133.68               | 4.4           | 78.40%               | 26.18                  |
| TF-35  | 134.84               | 4.6           | 85.40%               | 28.97                  |
| TF-36  | 130.30               | 6.2           | 80.40%               | 27.22                  |
